# Supplementary material for: RTEC-intrinsic IL-17–driven inflammatory circuit amplifies antibody-induced glomerulonephritis and is constrained by Regnase-1
Source: PubMed Central journal article supplement (PMC8410033; doi:10.1172/jci.insight.147505), 2021-07-08

## Supplementary materials

### Supplementary Figure Legends

**Fig S1: Representative flow cytometry gating strategy for identification of CD45<sup>+</sup> subsets:** Neutrophils (CD45<sup>+</sup>CD11b<sup>+</sup>Ly6G<sup>+</sup>), macrophages (CD45<sup>+</sup>Ly6C<sup>+</sup>Ly6G<sup>-</sup>CD11b<sup>hi</sup>F4/80<sup>hi</sup>), monocytes (CD45<sup>+</sup>Ly6C<sup>+</sup>Ly6G<sup>-</sup>CD11b<sup>low</sup>F4/80<sup>low</sup>), B cells (CD45<sup>+</sup>B220<sup>+</sup>), CD4<sup>+</sup> T cells (CD45<sup>+</sup>CD3<sup>+</sup>CD4<sup>+</sup>) and CD8<sup>+</sup> T cells (CD45<sup>+</sup>CD3<sup>+</sup>CD8<sup>+</sup>) infiltration in the AGN kidneys were analyzed by flow cytometry on day 7 post-AGN induction. Representative dot plots showing gating strategy.

**Fig S2: Reduced inflammatory cell infiltration in the nephritic kidney of RTEC-specific *Il17ra* deficient mice.** *Il17ra<sup>fl/fl</sup>* and *Il17ra<sup>Cdh16</sup>* mice ( $n=3-7$ ) were subjected to AGN. At day 7 post anti-GBM serum injection, (A) B, CD4<sup>+</sup> T and CD8<sup>+</sup> T cells numbers, and (B) neutrophils, macrophages, monocytes, B, CD4<sup>+</sup> T and CD8<sup>+</sup> T cells percentages from CD45<sup>+</sup> cells in the kidney were quantified by flow cytometry. The data is pooled from at least 2 independent experiments. Statistical analysis by Two-way ANOVA.

**Fig S3: Increased inflammatory cell infiltration in the nephritic kidney of *Zc3h12a*<sup>+/-</sup> mice.** *Zc3h12a<sup>+/+</sup>* (WT) and *Zc3h12a<sup>+/-</sup>* mice ( $n=3-6$ ) were subjected to AGN. At day 7 p.i., (A) monocytes, (B) B, CD4<sup>+</sup> T, and CD8<sup>+</sup> T cell numbers, and (C) neutrophils, macrophages, monocytes, B, CD4<sup>+</sup> T and CD8<sup>+</sup> T cells percentages from CD45<sup>+</sup> cells in the kidney were quantified by flow cytometry. (D) Bone marrow (BM) cells from *Zc3h12a<sup>+/-</sup>* and wild WT mice

were adoptively transferred into sub-lethally irradiated *Zc3h12a*<sup>+/-</sup> or WT recipients (n=5-8). Eight weeks later, successfully reconstituted mice were subjected to AGN and assessed for serum creatinine level. The data is pooled from at least 2 independent experiments. Statistical analysis by Two-way ANOVA (A-C) or One-way ANOVA (D).

**Fig S4: Increased inflammatory cell infiltration in the nephritic kidney of RTEC-specific Regnase-1 deficient mice.** *Zc3h12a*<sup>fl/fl</sup> and *Zc3h12a*<sup>Cdh16</sup> mice (n=3-6) were subjected to AGN. At day 7 p.i., (A) CD45<sup>+</sup> cell numbers and (B) neutrophils, macrophages, monocytes, B, CD4<sup>+</sup> T and CD8<sup>+</sup> T cells percentages from CD45<sup>+</sup> cells in the kidney were quantified by flow cytometry. The data is pooled from at least 2 independent experiments. Statistical analysis by unpaired Student's t test (A) and Two-way ANOVA (B).

**Fig S5: Deletion of ZC3H12A gene drives inflammatory mediator expression in the HK-2 cell line.** HK-2 and HK-2<sup>ΔZC3H12A</sup> cells were stimulated with IL-17 and/or TNFα for 8 h. (A) Gene expression of *CEBPB* and *CEBPD* was measured by qPCR, normalized to *GAPDH*. (B) Cell lysates were evaluated for C/EBPβ and C/EBPδ protein expression by western blot. Protein relative abundance and representative image are shown. (C) *Lcn2* promoter activity was measured by luciferase assay in IL-17 Reporter HEK 293 cells after IL-17 stimulation. Data pooled from at least 3 independent experiments. Statistical analysis by Two-way ANOVA (A and B) and unpaired Student's t test (C).

Supplemental Figures

Figure S1

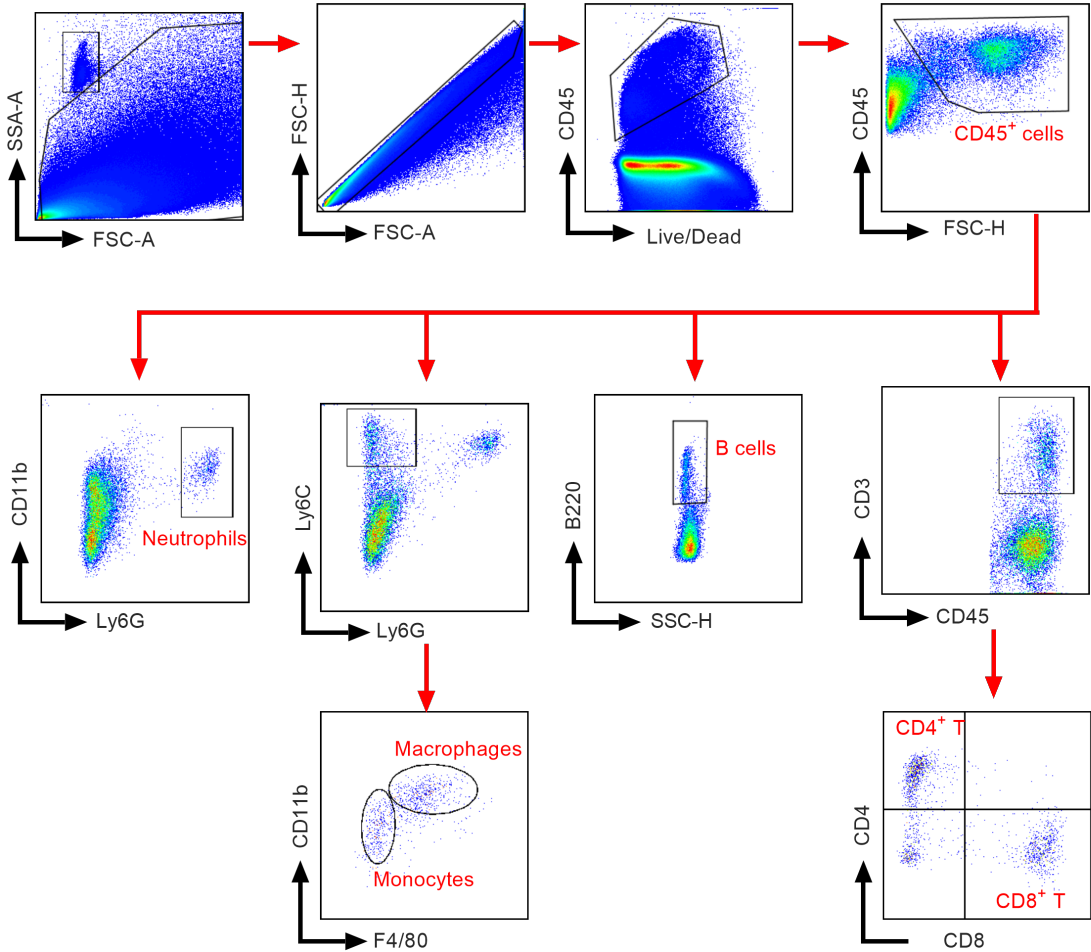

Figure S2

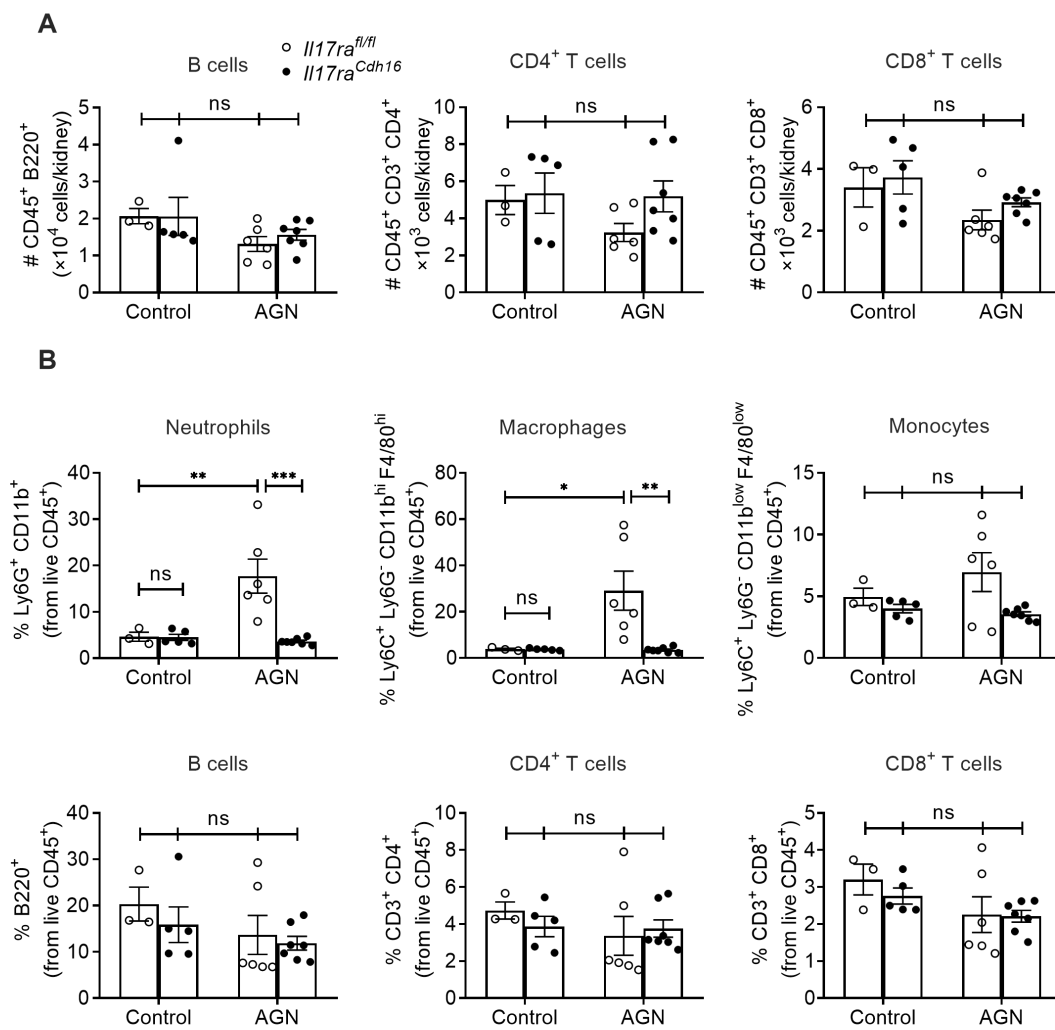

Figure S3

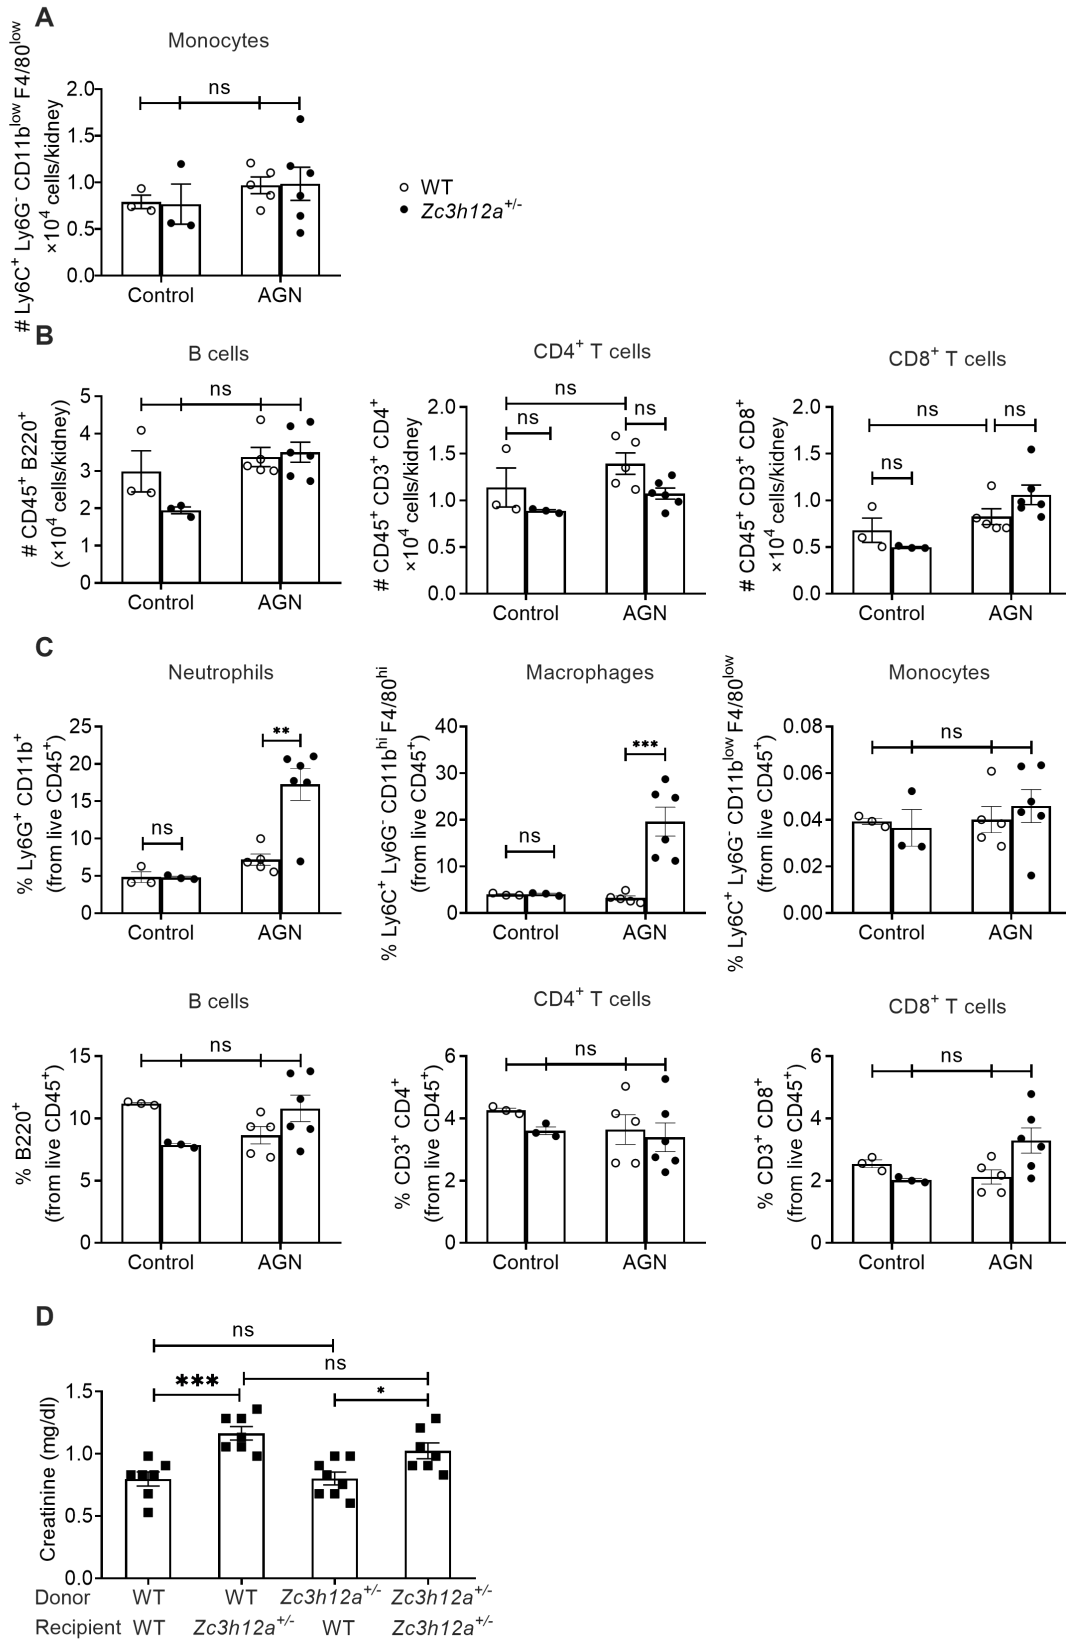

Figure S4

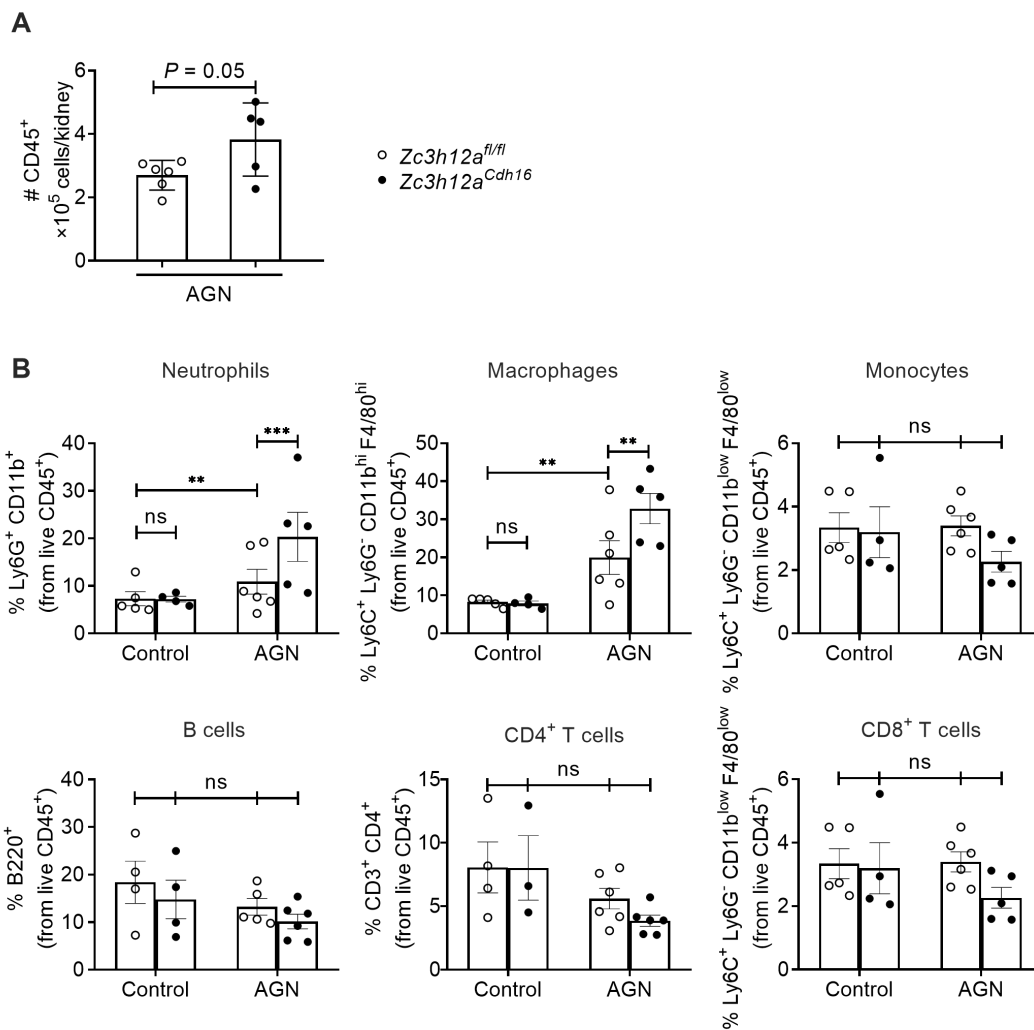

Figure S5

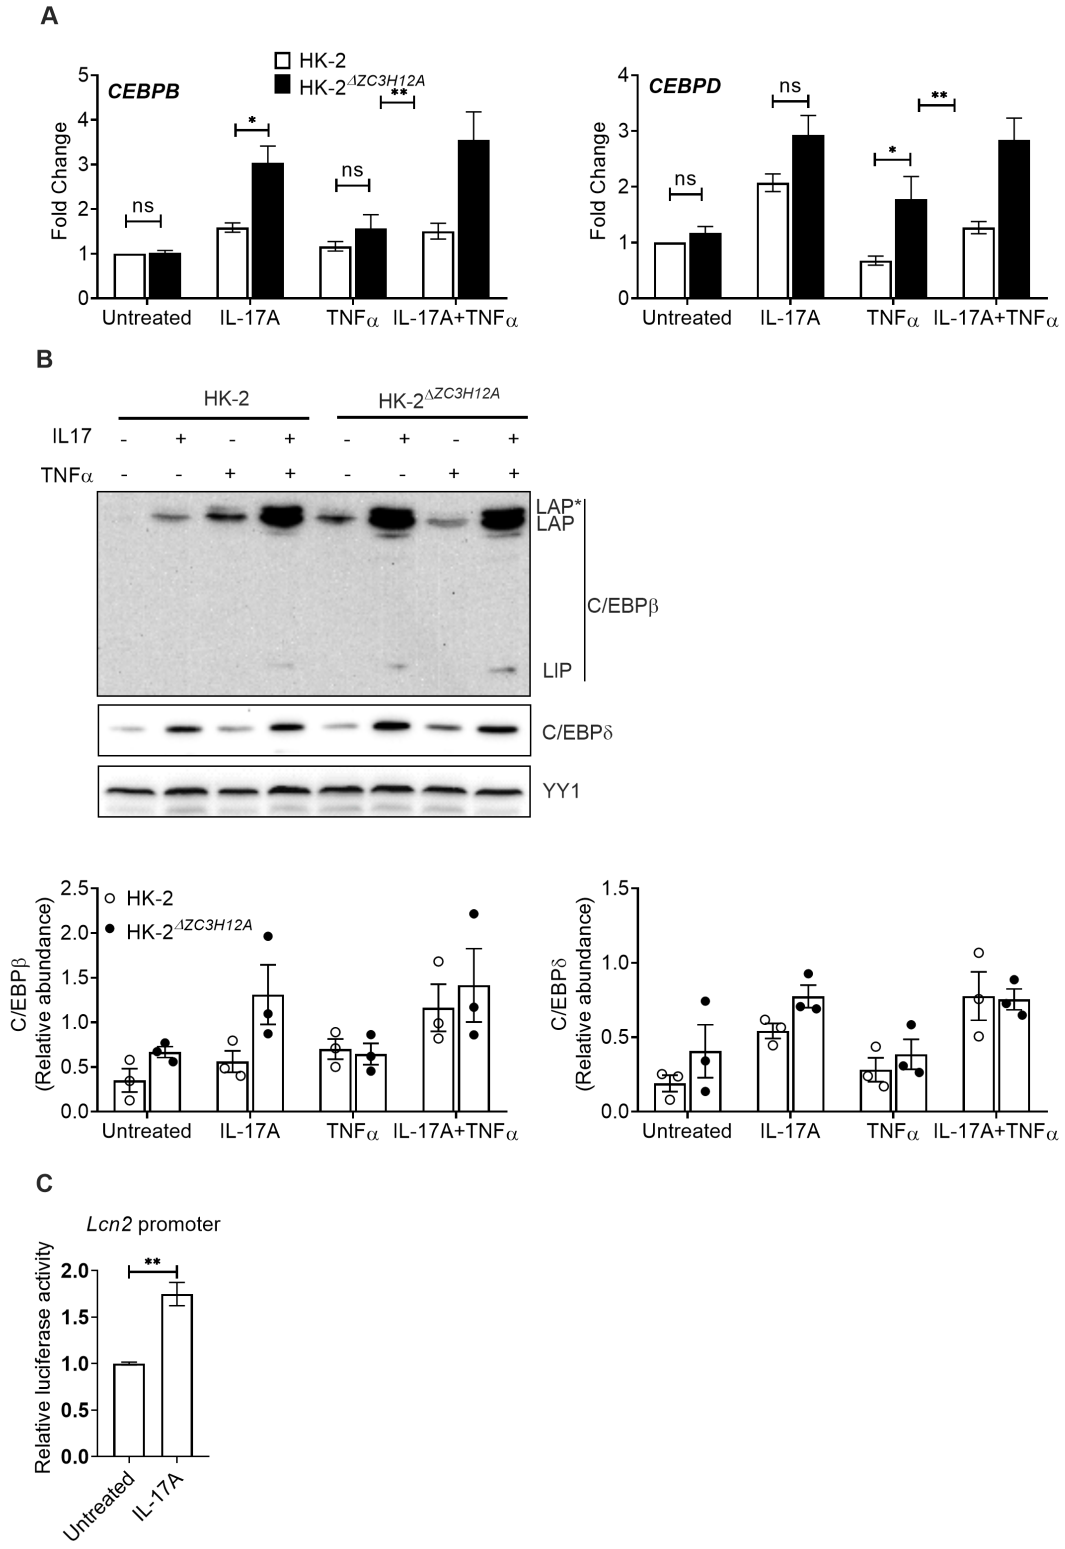

Supplement: jciinsight-6-147505-s072.pdf [file jciinsight-6-147505-s072.pdf]
